# Supplementary material
Source: publisher figshare collection journal article supplement (https://microbiology.figshare.com/articles/dataset/_/23814852)
Supplement: Supplementary file 1 [file 1]

## 1. Supplementary Material

**Supplementary Table 1.** BLAST analysis of 16S rRNA gene and the concatenated *dnaK\_mutL\_pheS* genes of HO 1656<sup>T</sup> and related species.

| Species (accession number)                                                                         | 16S rRNA identity | <i>dnaK_mutL_pheS</i> identity |
|----------------------------------------------------------------------------------------------------|-------------------|--------------------------------|
| HO 1656 <sup>T</sup> (GCF_029726355.1)                                                             | 100.0             | 100.0                          |
| <i>Lactcaseibacillus</i> sp. BCRC 81376 (GCF_029589085.1)                                          | 99.7              | 100.0                          |
| <i>Lactcaseibacillus casei</i> DSM 20011 <sup>T</sup> (GCF_000829055.1)                            | 99.7              | 96.3                           |
| <i>Lactcaseibacillus chiayiensis</i> NBRC 112906 <sup>T</sup> (GCF_004123795.1)                    | 99.7              | 90.8                           |
| HO 0673 (GCF_029748795.1)                                                                          | 99.6              | 100.0                          |
| <i>Lactcaseibacillus zeae</i> DSM 20178 <sup>T</sup> (GCF_001433745.1)                             | 99.5              | 95.2                           |
| <i>Lactcaseibacillus paracasei</i> subsp. <i>tolerans</i> DSM 20258 <sup>T</sup> (GCF_001436485.1) | 99.4              | 84.0                           |
| <i>Lactcaseibacillus paracasei</i> subsp. <i>paracasei</i> DSM 5622 <sup>T</sup> (GCF_001436385.1) | 99.1              | 82.0                           |
| <i>Lactcaseibacillus rhamnosus</i> DSM 20021 <sup>T</sup> (GCF_001435405.1)                        | 98.9              | 82.9                           |
| <i>Lactcaseibacillus mingshuiensis</i> 117-1 <sup>T</sup> (GCF_016861785.1)                        | 96.5              | 74.6                           |
| <i>Lactcaseibacillus yichunensis</i> 33-1 <sup>T</sup> (GCF_003946405.1)                           | 96.4              | 74.4                           |
| <i>Lactcaseibacillus suilingensis</i> ZW152 <sup>T</sup> (GCF_016861845.1)                         | 95.6              | 75.7                           |
| <i>Lactcaseibacillus baoqingensis</i> 47-3 <sup>T</sup> (GCF_003946165.1)                          | 95.6              | 74.3                           |
| <i>Lactcaseibacillus suibinensis</i> 247-3 <sup>T</sup> (GCF_003946175.1)                          | 95.5              | 79.1                           |
| <i>Lactcaseibacillus brantae</i> DSM 23927 <sup>T</sup> (GCF_001436115.1)                          | 95.3              | 76.1                           |
| <i>Lactcaseibacillus saniviri</i> DSM 24301 <sup>T</sup> (GCF_001437465.1)                         | 95.1              | 75.4                           |
| <i>Lactcaseibacillus jixianensis</i> 159-4 <sup>T</sup> (GCF_003946485.1)                          | 95.1              | 79.0                           |
| <i>Lactcaseibacillus parakribbianus</i> YH-lacS6 <sup>T</sup> (GCF_025490915.1)                    | 95.0              | 73.8                           |
| <i>Lactcaseibacillus hegangensis</i> 73-4 <sup>T</sup> (GCF_003946465.1)                           | 94.9              | 75.0                           |
| <i>Lactcaseibacillus kribbianus</i> YH-lac21 <sup>T</sup> (GCF_020180945.1)                        | 94.9              | 73.9                           |
| <i>Lactcaseibacillus camelliae</i> DSM 22697 <sup>T</sup> (GCF_001436615.1)                        | 94.7              | 78.9                           |
| <i>Lactcaseibacillus daqingensis</i> 143-4(a) <sup>T</sup> (GCF_003946115.1)                       | 94.3              | 75.0                           |
| <i>Lactcaseibacillus manihotivorans</i> DSM 13343 <sup>T</sup> (GCF_001435035.1)                   | 94.3              | 74.6                           |
| <i>Lactcaseibacillus porcinae</i> JCM 19617 <sup>T</sup> (GCF_003946305.1)                         | 94.3              | 74.5                           |
| <i>Lactcaseibacillus absianus</i> YH-lac23 <sup>T</sup> (GCF_013407595.1)                          | 94.2              | 76.3                           |
| <i>Lactcaseibacillus zhaodongensis</i> 1206-1 <sup>T</sup> (GCF_009687905.1)                       | 94.2              | 72.9                           |
| <i>Lactcaseibacillus nasuensis</i> JCM 17158 <sup>T</sup> (GCF_001434705.1)                        | 94.0              | 79.0                           |
| <i>Lactcaseibacillus songhuajiangensis</i> 7-19 <sup>T</sup> (GCF_003946025.1)                     | 93.7              | 78.7                           |
| <i>Lactcaseibacillus thailandensis</i> DSM 22698 <sup>T</sup> (GCF_001436135.1)                    | 93.5              | 78.6                           |
| <i>Lactcaseibacillus pantheris</i> NBRC 106106 <sup>T</sup> (GCF_001591865.1)                      | 93.3              | 73.5                           |
| <i>Lactcaseibacillus</i> sp. KACC 23028 (GCF_028736235.1)                                          | 93.3              | 78.2                           |
| <i>Lactcaseibacillus sharpeae</i> DSM 20505 <sup>T</sup> (GCF_001436225.1)                         | 93.2              | 73.4                           |
| <i>Lactcaseibacillus hulanensis</i> ZW163 <sup>T</sup> (GCF_004010095.1)                           | 92.8              | 77.1                           |

**Supplementary Table 2.** Assembly statistics of the whole genome sequence assembly of HO 1656<sup>T</sup> and HO 0673.

|                              | HO 1656 <sup>T</sup>                                         | HO 0673                                                      |
|------------------------------|--------------------------------------------------------------|--------------------------------------------------------------|
| accession number             | GCA_029726355.1                                              | GCA_029748795.1                                              |
| genome size                  | 3,094,327 bp                                                 | 3,134,028 bp                                                 |
| N50                          | 3,094,327 bp                                                 | 3,134,028 bp                                                 |
| Coverage                     | 807.3                                                        | 481.4                                                        |
| G and C content [ml%]        | 48.0                                                         | 48.0                                                         |
|                              | 1 contig per replicon.<br>Here 1 chromosome,<br>no plasmids. | 1 contig per replicon.<br>Here 1 chromosome,<br>no plasmids. |
| prokka annotation            |                                                              |                                                              |
| number of annotated features |                                                              |                                                              |
| CDS                          | 2798                                                         | 2894                                                         |
| total RNA                    | 108                                                          | 111                                                          |
| ncRNAs                       | 33                                                           | 36                                                           |
| rRNAs                        | 15                                                           | 15                                                           |
| t(m)RNAs                     | 60                                                           | 60                                                           |

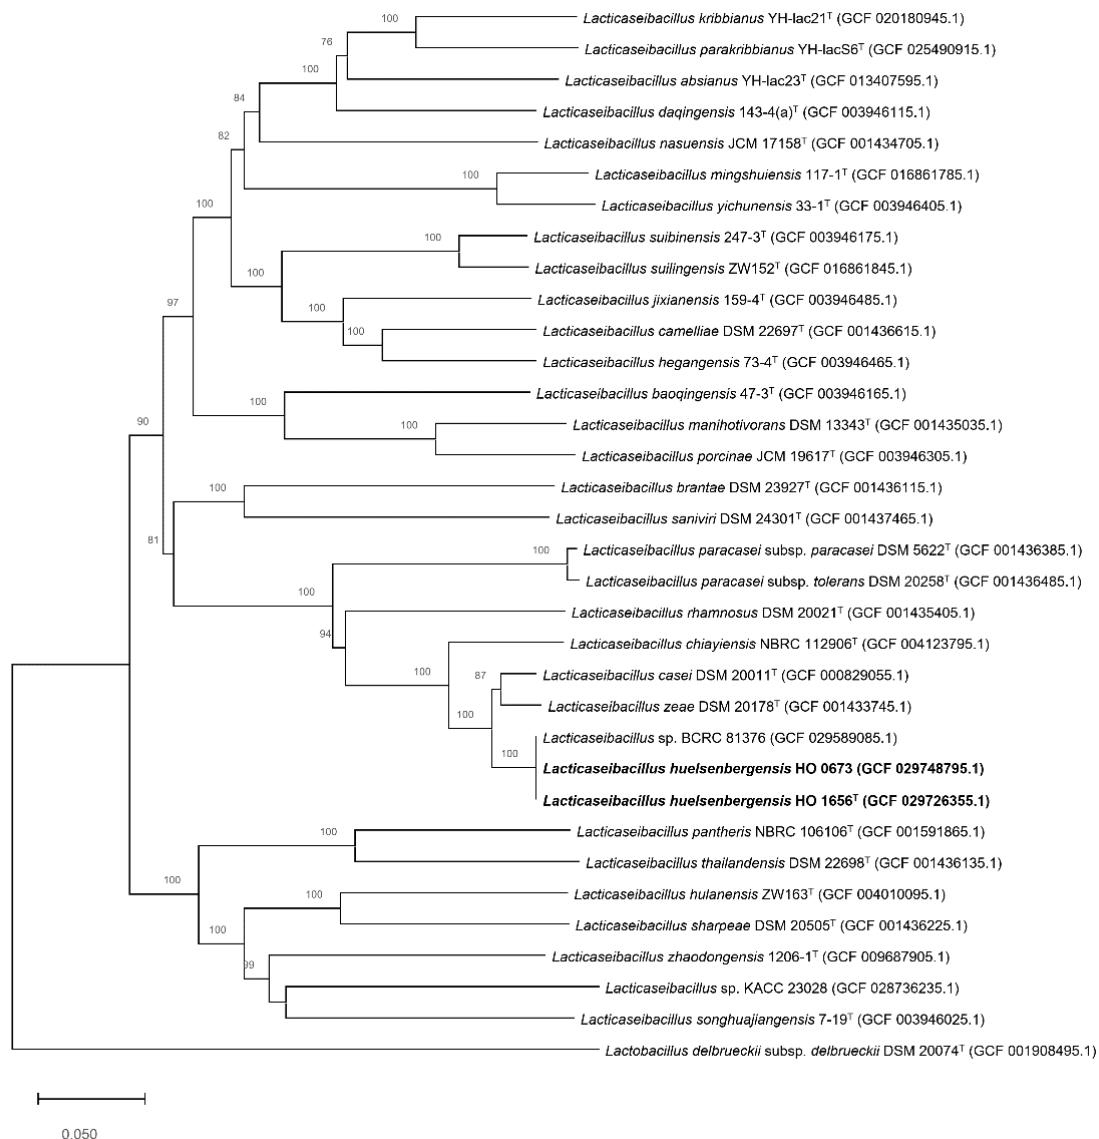

**Supplementary Figure 1.** Phylogenetic tree based on the concatenated sequences of the *dnaK*, *mutL* and *pheS* genes, reconstructed with the neighbour-joining algorithm, indicating the position of the strains HO 1656<sup>T</sup> and HO 0673 in the *Lactocaseibacillus* group. *Lactobacillus delbrueckii* subsp. *delbrueckii* DSM 20074<sup>T</sup> served as outgroup. Bootstrap values greater than 70% based on 1000 replicates are indicated at each node. Bar, 0.05 substitutions per nucleotide position.

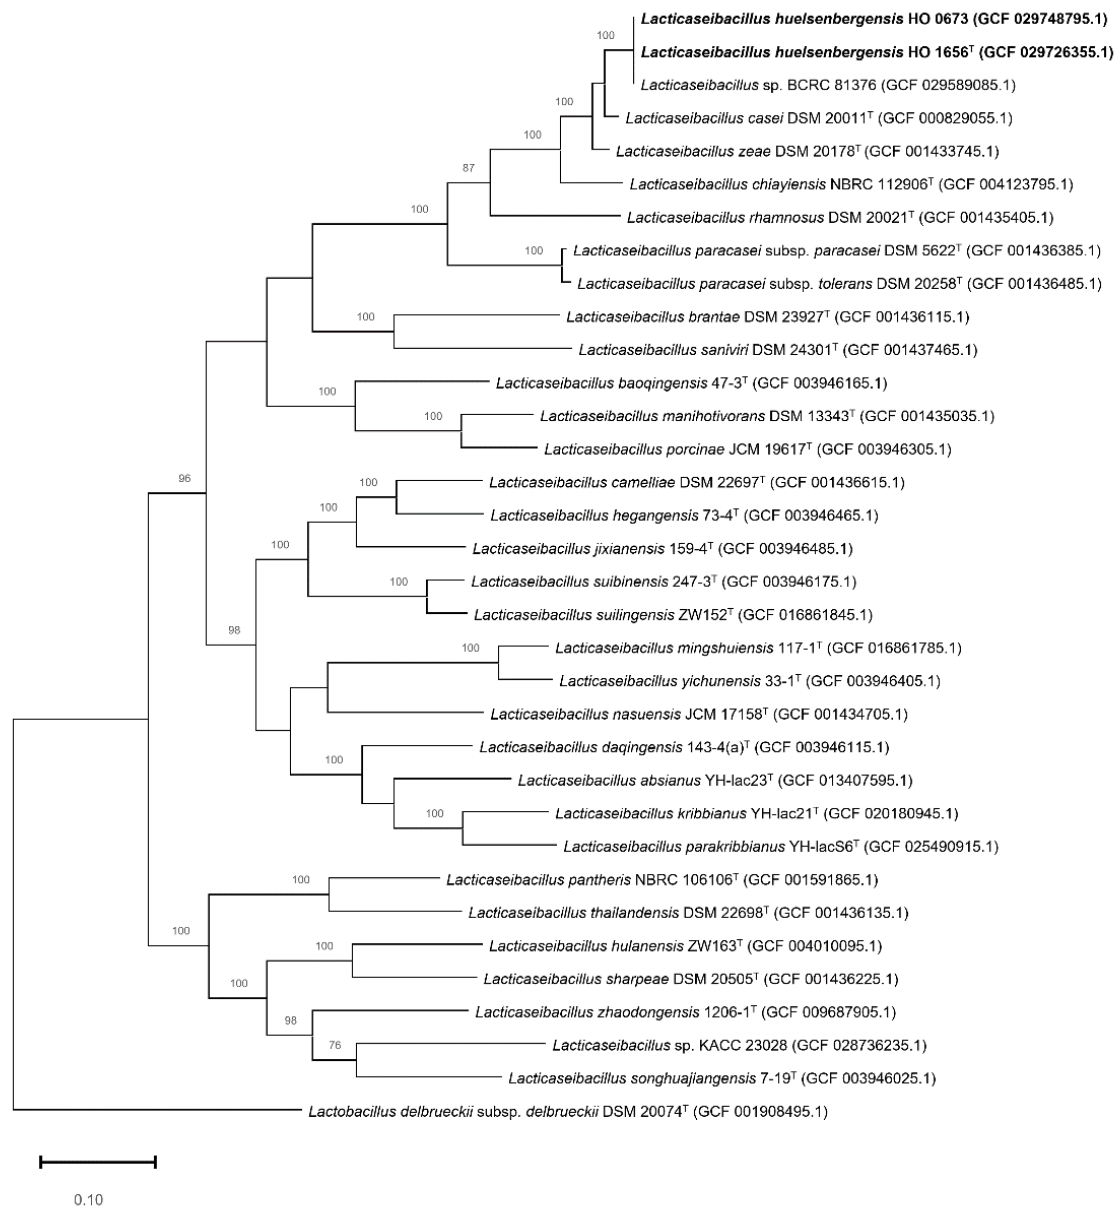

**Supplementary Figure 2.** Phylogenetic tree based on the concatenated sequences of the *dnaK*, *mutL* and *pheS* genes, reconstructed with the maximum-likelihood algorithm, indicating the position of the strains HO 1656<sup>T</sup> and HO 0673 in the *Lactocaseibacillus* group. *Lactobacillus delbrueckii* subsp. *delbrueckii* DSM 20074<sup>T</sup> served as outgroup. Bootstrap values greater than 70% based on 1000 replicates are indicated at each node. Bar, 0.10 substitutions per nucleotide position.

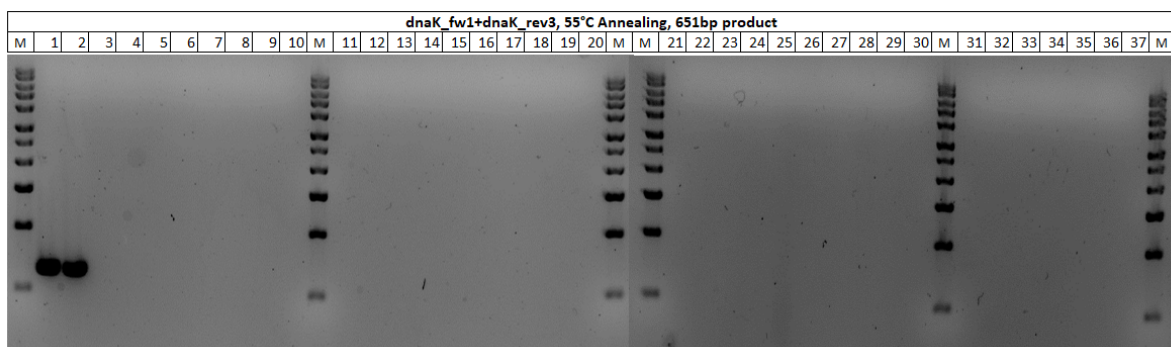

**Supplementary Figure 3.** PCR with species specific primers. M, 1kb DNA marker (Roth); 1, HO 1656<sup>T</sup> (GCF\_029726355.1); 2, HO 0673 (GCF\_029748795.1); 3, *L. casei* DSM 20011<sup>T</sup>; 4, *L. zae* DSM 20178<sup>T</sup>; 5, *L. chiayiensis* NBRC112906<sup>T</sup>; 6, *L. paracasei* subsp. *paracasei* DSM 5622<sup>T</sup>; 7, *L. paracasei* subsp. *tolerans* DSM 20258<sup>T</sup>; 8, *L. rhamnosus* DSM 20021<sup>T</sup>; 9, *S. perolens* DSM 12744<sup>T</sup>; 10, *L. yichunensis* NCIMB 15169<sup>T</sup>; 11, *L. diolivorans* DSM 14221<sup>T</sup>; 12, *L. reuteri* DSM 20016<sup>T</sup>; 13, *L. sakei* subsp. *sakei* DSM 20017<sup>T</sup>; 14, *L. buchneri* subsp. *buchneri* DSM 20057<sup>T</sup>; 15, *L. brevis* DSM 20054<sup>T</sup>; 16, *Lactococcus cremoris* subsp. *cremoris* DSM 20069<sup>T</sup>; 17, *L. lactis* subsp. *lactis* DSM 20481<sup>T</sup>; 18, *L. delbrucknerii* subsp. *bulgaricus* DSM 20081<sup>T</sup>; 19, *L. farraginis* DSM 18382<sup>T</sup>; 20, *L. parafarraginis* DSM 18390<sup>T</sup>; 21, *L. curvatus* DSM 20019<sup>T</sup>; 22, *L. plantarum* subsp. *plantarum* DSM 20174<sup>T</sup>; 23, *F. sanfransiscensis* DSM 20451<sup>T</sup>; 24, *L. amylovorus* DSM 20531<sup>T</sup>; 25, *L. fermentum* DSM 20052<sup>T</sup>; 26, *S. collinoides* DSM 20515<sup>T</sup>; 27, *L. acidophilus* DSM 20079<sup>T</sup>; 28, *L. frumenti* DSM 13145<sup>T</sup>; 29, *L. kefir* DSM 20587<sup>T</sup>; 30, *L. vaginalis* DSM 5837<sup>T</sup>; 31, *L. coryniformis* subsp. *coryniformis* DSM 20001<sup>T</sup>; 32, *L. rapi* DSM 19907<sup>T</sup>; 33, *L. pentosus* DSM 20314<sup>T</sup>; 34, *L. kisonensis* DSM 19906<sup>T</sup>; 35, *L. hilgardii* DSM 20176<sup>T</sup>; 36, *L. parabuchneri* DSM 5707<sup>T</sup>; 37, *L. gasseri* DSM 20243<sup>T</sup>.

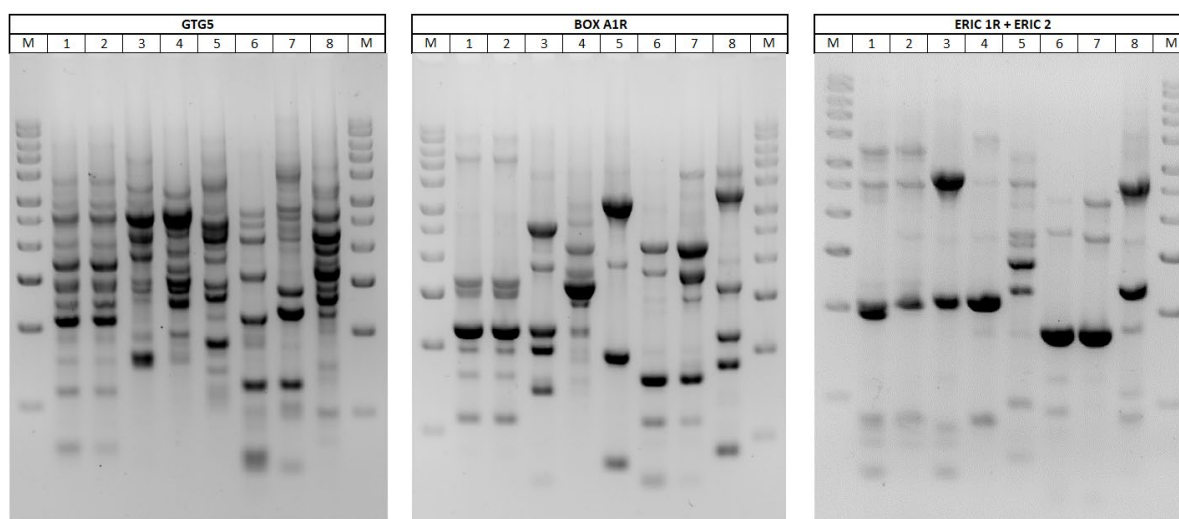

**Supplementary Figure 4.** Rep-PCR with the primers (GTG)<sub>5</sub>, ERIC1R and ERIC2 and BOXA1R.

M, 1kb DNA marker (Roth); 1, HO 0673; 2, HO 1656<sup>T</sup>; 3, *L. casei* DSM20011<sup>T</sup>; 4, *L. zeae* DSM20178<sup>T</sup>; 5, *L. chiayiensis* NBRC112906<sup>T</sup>; 6, *L. paracasei* subsp. *paracasei* DSM5622<sup>T</sup>; 7, *L. paracasei* subsp. *tolerans* DSM20258<sup>T</sup>; 8, *L. rhamnosus* DSM20021<sup>T</sup>.

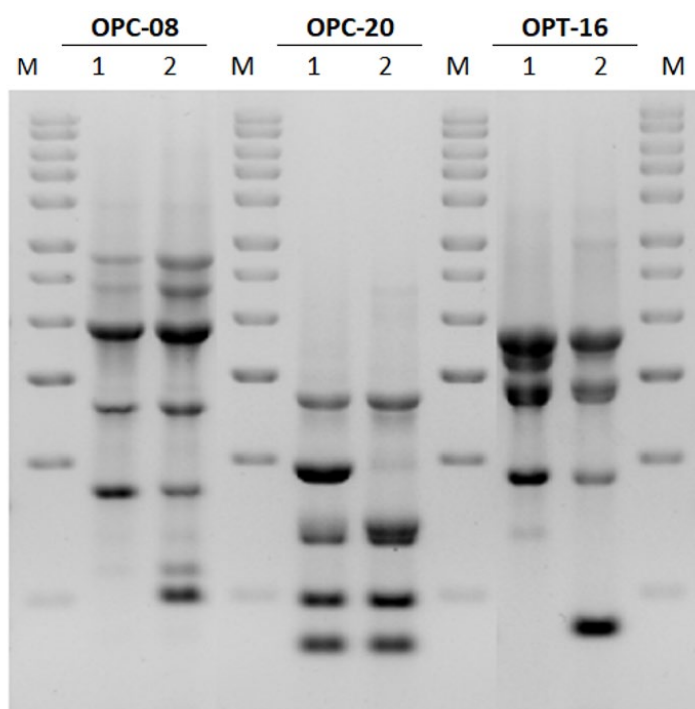

**Supplementary Figure 5.** RAPD PCR of the novel isolates with the primer OPC-08, OPC-20 and OPT16. M, 1 kb DNA marker (Roth); 1, HO 0673; 2, HO 1656<sup>T</sup>.

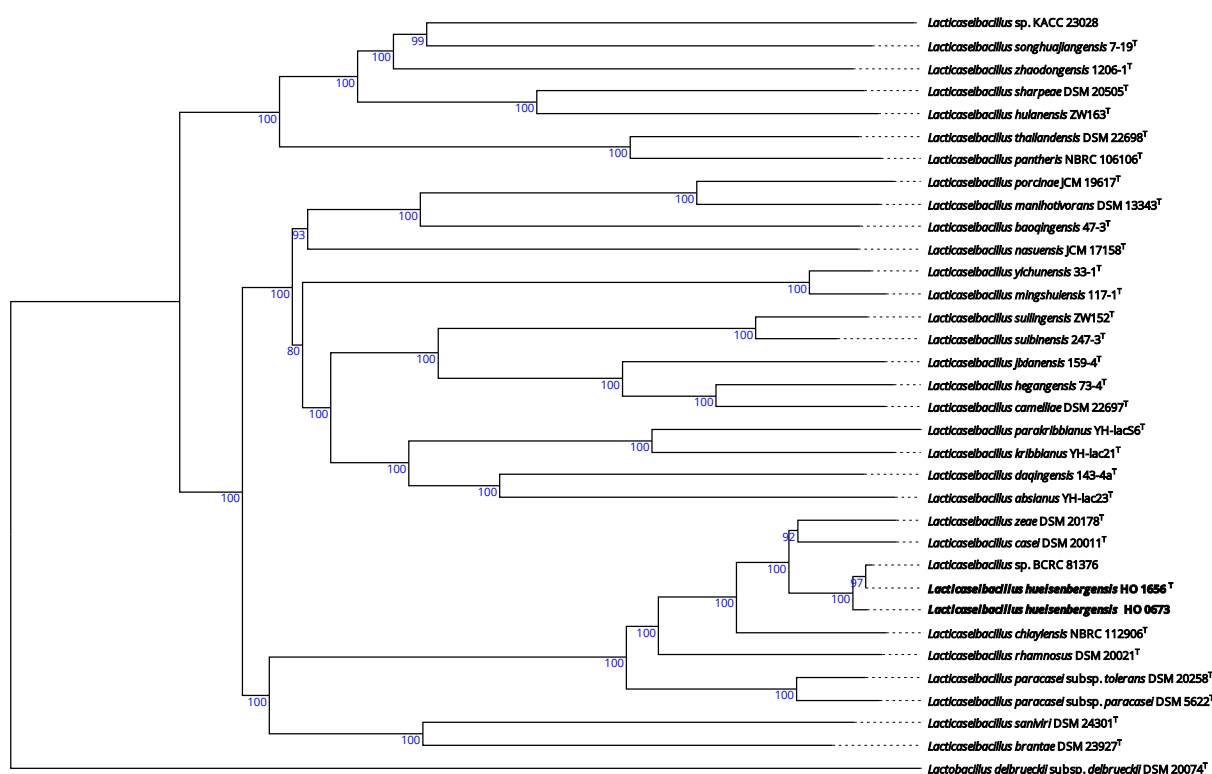

**Supplementary Figure 6.** Phylogenetic analysis of the novel isolates' HO 1656<sup>T</sup> and HO 0673 core genome using the proteome based TYGS phylogeny. Reference strains are all valid *Lactocaseibacillus* type strains currently available at LPSN, plus all novel *Lactocaseibacillus* sp. genomes submitted to Genbank (*Lactocaseibacillus* sp. BCRC 81376 (GCF\_029589085.1) and *Lactocaseibacillus* sp. KACC 23028 (GCF\_028736235.1)), *Lactobacillus delbrueckii* subsp. *delbrueckii* DSM 20074<sup>T</sup> served as outgroup. Tree inferred with FastME 2.1.6.1 (60) from whole-proteome-based GBDP distances. The branch lengths are scaled via GBDP distance formula d5. Branch values are GBDP pseudo-bootstrap support values > 60 % from 100 replications, with an average branch support of 98.5 %. The tree was midpoint-rooted (61).
